# Supplementary material for: A Genome-Wide RNAi Screen Identifies Regulators of Cholesterol-Modified Hedgehog Secretion in Drosophila
Source: PLoS One. 2012 Mar 14;7(3):e33665. doi: 10.1371/journal.pone.0033665 (PMC3303847; doi:10.1371/journal.pone.0033665)
Supplement: Table S3 — Hits eliminated from secondary screening based on effect on cytoplasmic firefly activity. (XLS) [file pone.0033665.s011.xls]

## Sheet: firefly_low.xls
Table S3											Aikin et al.
Hits eliminated from secondary screening based on effect on cytoplasmic firefly activity listed by gene name. CGs and Human Homologene information was obtained from the DRSC database (www.flyrnai.org). "Primary Amplicon ID" indicates the DRSC amplicon used in the primary screen. The number of 19 base pair off targets (19 bp OT), and CAR/CAN repeats is given for the primary amplicon. The average o…
							Average Z-scores from primary screen
Gene	CGs	Human Homologene	Primary Amplicon ID	19 bp OT	CAR	CAN	Firefly	Medium Renilla / Firefly	Lysate Renilla / Firefly	Medium Renilla / Lysate Renilla
beta'Cop	CG6699	COPB2	DRSC03492	1	No	No	-2.9	-4.17048	1.49612	-7.48254
c12.1	CG12135	HSPC148	DRSC18750	6	No	No	-3.99164	-2.49454	0.216406	-2.7811
cg	CG8367		DRSC07650	432	Yes	Yes	-4.84319	-1.3905	2.06569	-2.86829
CG10107	CG10107		DRSC08841	272	Yes	Yes	-2.71523	-2.19585	-0.478531	-2.41762
CG1142	CG1142		DRSC12531	0	No	No	2.30278	-4.40785	-4.09884	-0.395539
CG15321	CG15321		DRSC18006	11	No	No	-3.0389	-3.88063	-0.807153	-3.30358
CG17672	CG17672, CG11271		DRSC09230	605	Yes	Yes	-2.99467	-3.69566	-1.16018	-3.44853
CG30089	CG30089, CG12305, CG12967, CG12966		DRSC06127	842	Yes	Yes	-6.9122	0.400227	2.63069	-1.58691
CG32264	CG32264, CG10860, CG10857, CG14978, CG12604	PHACTR3	DRSC08061	307	Yes	Yes	-2.35728	-2.68455	-1.19211	-2.4102
CG33541	CG33541		DRSC13298	483	Yes	Yes	-4.69385	-2.33062	-0.0750606	-2.77933
CG5151	CG5151		DRSC10487	420	Yes	Yes	-2.60749	-2.83253	-1.44002	-1.80394
CG5611	CG5611		DRSC15843	0	No	No	3.69044	-0.93289	2.50867	-2.8208
CG5844	CG5844		DRSC15890	0	No	No	-2.42385	-5.6438	-2.3305	-3.67038
CG7757	CG7757	PRPF3	DRSC10912	1	No	No	-3.50587	-2.67037	-0.174916	-2.76026
cpa	CG10540	CAPZA1	DRSC04080	0	No	No	2.6048	-3.26096	-3.25928	-0.952507
CycE	CG3938	CCNE1	DRSC03296	0	No	No	3.12299	-2.98155	-3.56793	-0.104649
Dsp1	CG12223	HMGB2	DRSC20315	549	Yes	Yes	-6.33735	-1.4688	1.36017	-2.86007
eyg	CG10488		DRSC11344	568	Yes	Yes	-4.79927	-1.6464	0.971351	-2.37183
fzy	CG4274	CDC20	DRSC03534	0	No	No	-3.6975	-0.994168	2.07808	-2.87331
HDC07108			DRSC05715	99	Yes	Yes	-3.13692	-2.71692	2.40384	-4.59839
HDC08349			DRSC08080	221	Yes	Yes	-3.34205	-1.7112	0.377153	-2.87304
HDC08645			DRSC08772	29	Yes	Yes	-3.01857	-1.87765	0.865139	-3.68784
HDC11349			DRSC11488	11	No	No	-2.20875	-1.33687	2.10765	-3.84115
HDC15172			DRSC13607	44	No	No	-2.30724	-3.95922	-0.516208	-4.09896
HDC18670			DRSC18963	676	Yes	Yes	-2.75209	-3.00441	-0.102005	-3.34736
HDC18875			DRSC19029	383	Yes	Yes	-2.57692	-2.74609	0.54192	-2.16268
HDC19589			DRSC19267	486	Yes	Yes	-2.22599	-2.31799	1.69081	-2.95997
I-t	CG14719		DRSC16713	0	No	No	-2.30269	-2.30015	-0.113863	-2.28125
Kap-alpha3	CG9423	KPNA4	DRSC16976	0	No	No	-2.83212	-0.425624	2.47398	-2.77351
mura	CG9381, CG9382		DRSC16484	379	Yes	Yes	-6.21411	-0.35711	2.89111	-3.0841
Pros26.4	CG5289	PSMC1	DRSC16799	2	No	No	2.02954	-3.30971	-0.988029	-2.12581
puc	CG7850	DUSP10	DRSC17034	2	No	No	3.50018	-2.9766	-4.159	1.49573
ran	CG1404	RAN	DRSC20364	1	No	No	-3.00958	-1.85408	0.233411	-2.1484
RpL13	CG4651	RPL13	DRSC03416	0	No	No	3.4609	-4.31082	-1.34843	-0.888845
RpL15	CG17420, CG40199		DRSC20963	0	No	No	3.68223	-5.00218	-4.54424	-0.871063
RpL17	CG3203	RPL17	DRSC18293	5	No	No	4.351	-2.48537	-2.74034	-0.313771
RpL18	CG8615	RPL18	DRSC11016	2	No	No	5.53202	-4.7635	-2.75078	-1.35232
RpL22	CG7434	RPL22	DRSC18707	8	No	No	5.74326	-4.5617	-6.33062	-0.640321
RpL23A	CG7977	hCG_16001	DRSC08694	2	No	No	3.102	-3.5044	-1.11165	-2.73649
RpL26	CG6846	RPL26	DRSC10726	0	No	No	3.48783	-5.1544	-4.6874	-0.83762
RpL32	CG7939	RPL32	DRSC16835	1	No	No	3.93951	-3.61277	-3.79182	1.53042
RpL35	CG4111	RPL35	DRSC18347	0	No	No	2.38253	-4.19595	-2.21536	-0.784064
RpL36	CG7622		DRSC18708	0	No	No	3.99862	-4.00972	-2.65681	-0.0237141
RpL4	CG5502	RPL4	DRSC16833	3	No	No	2.99046	-4.87731	0.0167483	-4.28952
RpL5	CG17489		DRSC03801	4	No	No	2.57382	-3.90499	-4.30522	-0.61551
RpL7A	CG3314	RPL7A	DRSC18709	1	No	No	3.51999	-3.06779	-3.15057	0.844066
RpLP0	CG7490	RPLP0	DRSC22110	0	No	No	3.36243	-2.22714	-1.15533	-1.36557
RpS26	CG10305	RPS26, LOC728937	DRSC03420	0	No	No	3.21063	-2.53475	-1.66634	-1.27076
rut	CG9533	ADCY1	DRSC20367	773	Yes	Yes	-3.60223	0.484611	2.81068	-2.23294
scrt	CG1130		DRSC08736	716	Yes	Yes	-2.2516	-0.882435	1.71575	-2.24827
Sec61alpha	CG9539	SEC61A2	DRSC03256	0	No	No	-2.20681	-3.77422	-3.03599	-0.256373
Smg5	CG8954	SMG5	DRSC03124	2	No	No	3.42613	-3.65261	-4.23115	-0.122197
Ssrp	CG4817	SSRP1	DRSC04658	1	No	No	4.67959	-2.04845	-3.01348	0.516891
tho2	CG4263, CG31671	THOC2	DRSC00646	1	No	No	-2.51207	2.24353	2.33582	-0.448138
